# Supplementary material
Source: Springer Nature journal article supplement (https://www.springermedizin.de/resource/supplementary/12931_2013_1425_MOESM7_ESM.pdf/9425968)

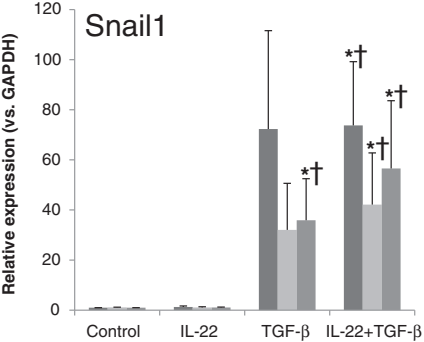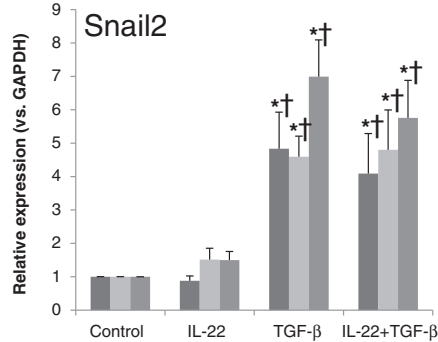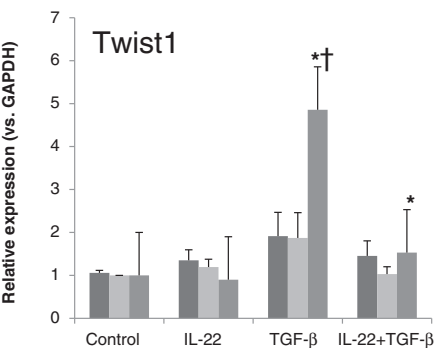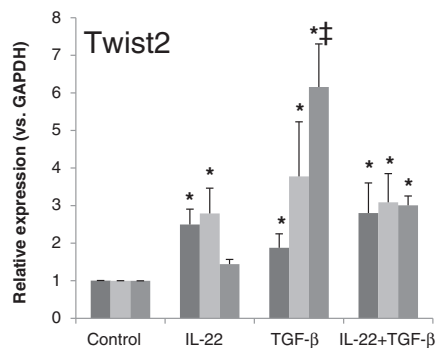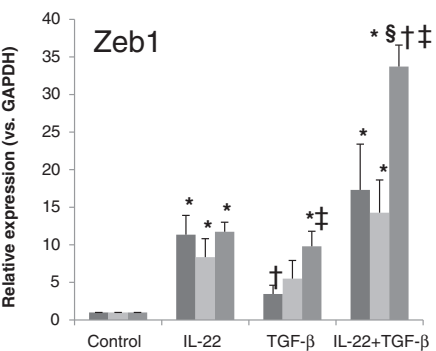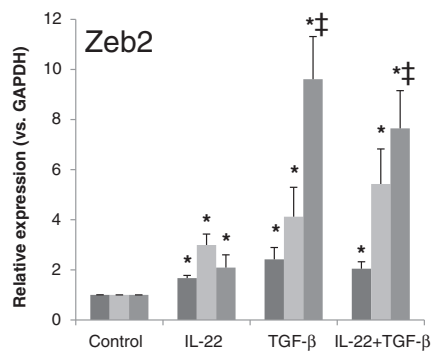

■ Healthy controls  
 ■ Mild asthmatics  
 ■ Severe asthmatics

Supplement: MOESM7 [file 9425968]
